# Supplementary material for: Revealing the molecular mechanisms of proteolysis of SARS-CoV-2 Mpro by QM/MM computational methods
Source: PubMed Central journal article supplement — Chem Sci. 2020 Jun 25;11(39):10626–30. doi: 10.1039/d0sc02823a (PMC8162313; doi:10.1039/d0sc02823a), 2020-06-25
Supplement: SC-011-D0SC02823A-s001.pdf [file SC-011-D0SC02823A-s001.pdf]

## SUPPPORTING INFORMATION

### Revealing the Molecular Mechanisms of Proteolysis of SARS-CoV-2 Mpro from QM/MM Computational Methods.

Katarzyna Świderek, Vicent Moliner

*Departament de Química Física i Analítica, Universitat Jaume I, 12071 Castellón, Spain.*

✉ swiderek@uji.es; moliner@uji.es

|                                                                                |            |
|--------------------------------------------------------------------------------|------------|
| <b>COMPUTATIONAL METHODS .....</b>                                             | <b>S2</b>  |
| Models set up.....                                                             | S2         |
| Analysis of classical non-accelerated NVT-MD simulations.....                  | S3         |
| QM/MM simulations .....                                                        | S4         |
| Potential Energy Surfaces.....                                                 | S5         |
| Free Energy Surfaces.....                                                      | S5         |
| Spline corrections .....                                                       | S6         |
| Substrate-enzyme interactions .....                                            | S7         |
| Paramaters for ACC.....                                                        | S8         |
| pKa values predicted for titratable residues .....                             | S10        |
| <b>RESULTS AND ANALYSIS .....</b>                                              | <b>S10</b> |
| M06-2X:AM1/MM Free energy surfaces.....                                        | S10        |
| Key distances of selected states along the most favourable reaction path ..... | S11        |
| Protein-substrate interactions .....                                           | S12        |
| <b>COORDINATES OF TS STRUCTURES.....</b>                                       | <b>S15</b> |
| <b>REFERENCES.....</b>                                                         | <b>S19</b> |

## COMPUTATIONAL METHODS

**Computational details of the molecular models set up.** The coordinates of atoms of SARS-CoV-2 Mpro were adapted from the X-Ray structure of its complex with the N3 inhibitor, as available in Protein Data Bank (PDB ID 6LU7).<sup>1</sup> Biological assemble (homodimer) was build using Discovery Studio Visualizer 19. Inhibitor N3 was replaced by the polypeptide Ac-Val-Lys-Leu-Gln-ACC (ACC is the fluorescent tag 7-amino-4-carbamoylmethylcoumarin) covalently bound to Cys145 through Gln, the substrate used in the kinetic studies.<sup>2</sup> Missing force field parameters for ACC residue, the part of substrate were generated using the Antechamber<sup>3</sup> program available in AmberTools package. Generated parameters are provided in Table S1. The protonation state of titratable residues was determined at pH 7 by estimating pKa shifts generated by the local environment on titratable groups using the empirical program PropKa ver. 3.0.3.<sup>4,5</sup> All residues were found in their standard protonation stage as shown in Table S2. After a detailed inspection of surrounding of each histidine residue, it was concluded that all should be neutral. However catalytically important His41 and His80 should be protonated in N $\delta$  position, while remaining His64, His163, His164, His172, and His246 on N $\epsilon$ . Presence of S-S linkage between Cys residues was not detected. According to determine pKa values all Cys residues should be protonated. After adding missing hydrogen atoms, the system was neutralized by addition of 7 sodium counter ions and placed in the box of 8.374  $\times$  8.087  $\times$  10.786 nm<sup>3</sup> of TIP3P<sup>6</sup> water molecules. Such a prepared model was further optimized, heated up to 310 Kelvins and equilibrated using Molecular Dynamic (MD) simulations under NPT conditions with AMBER force field,<sup>7</sup> as implemented in NAMD software.<sup>8</sup> Subsequently, 10 ns NVT MD simulations were performed in the peptide-protein covalently bound complex. The constant temperature during MD simulation was controlled using the Langevin thermostat.<sup>9</sup> Then we move backwards (through exploration QM/MM potential energy surfaces, as described below) to the reactants **E:S** non-covalent complex, and this structure was used for additional 42 ns of non-biased MD with time step of 1fs to observe the behavior of hydrogen bonds. It is important to point out that the calculations (and the system set up) were initiated from the conformation of the product of the acylation step (**E-I2** in Scheme 1 of the manuscript) in order to preliminarily avoid the debate on the protonation state of the catalytic dyad Cys145/His41 in the reactant state, **E:S**.

Robustness of MD simulations was examined by monitoring time dependence of RMSD (Fig. S1). Analysis was done using cpptraj software.<sup>10</sup> The structure of the MD simulation with the smallest deviation from average RMSD value was used to start the study of the molecular mechanism of the proteolysis. After optimization of the system, those residues located 20 Å beyond any atoms of the Gln5 of substrate were kept frozen in the remaining calculations. Potential energy surfaces, free energy surfaces and spline corrections have been performed using fDynamo<sup>11</sup> library together with implemented AMBER force field.<sup>12</sup> A Cut-off for nonbonding interactions was applied using a smooth switching function between 14.5 to 16 Å.

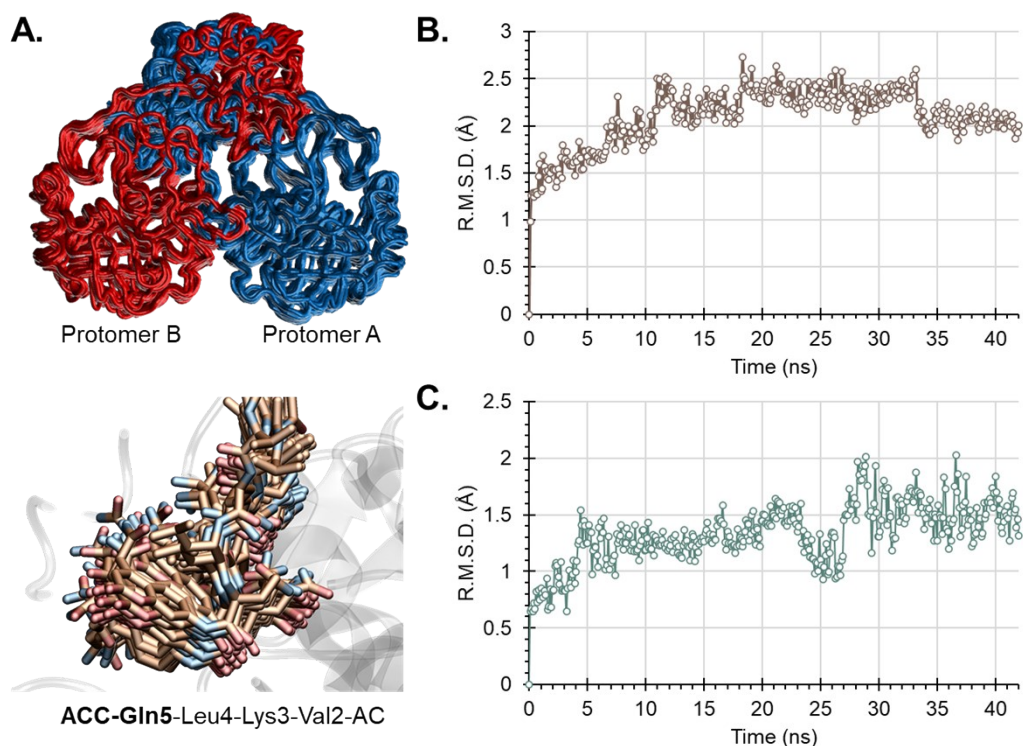

**Figure S1.** Analysis of classical non-accelerated 42 ns of NVT-MD simulations ( $T = 310$  K) explored using AMBER force field implemented in NAMD software. A. Displacement of Backbone of the protein (top) along MD simulations and of the part of the substrate and residues involve in the catalysis (bottom). B. Time evolution of the Root Mean Square Deviation (RMSD) of C-C $\alpha$ -N atoms of protein backbone C. Time evolution of the RMSD for all atoms of substrate.

**Computational details of the QM/MM simulations.** In this work, an additive hybrid QM/MM scheme was employed for the construction of the total Hamiltonian where the total energy is obtained from the sum of each contribution to the energy.

$$E_{QM/MM} = E_{QM} + E_{QM/MM}^{elect} + E_{QM/MM}^{vdW} + E_{MM} \quad (S1)$$

Here,  $E_{QM}$  describes the atoms in the QM part,  $E_{QM/MM}$  defines the interaction between the QM and MM region and  $E_{MM}$  describes the rest of the MM part. As shown in Figure S2, the QM subset of atoms includes ACC and Gln5 residues of the substrate, together with Cys145 and His41 residues of the protein. Four link atoms<sup>13</sup> were inserted where the QM/MM boundary intersected covalent bonds in the positions indicated on Figure S2. It is important to point out that after acylation step, when ACC group is departing from the active site the definition of QM region slightly changes. Now ACC group realized after the acylation step is substituted by four water molecules, one of which was defined in QM subset. Thus, for acylation step QM part consisted of 77 atoms, while for diacylation step of 54. The Austin Model 1 (AM1)<sup>14</sup> semiempirical and the Minnesota Functional M06-2X<sup>15</sup> with the standard 6-31+G(d,p) basis set were used to treat the QM sub-set of atoms, as implemented in Gaussian09 program.<sup>16</sup>

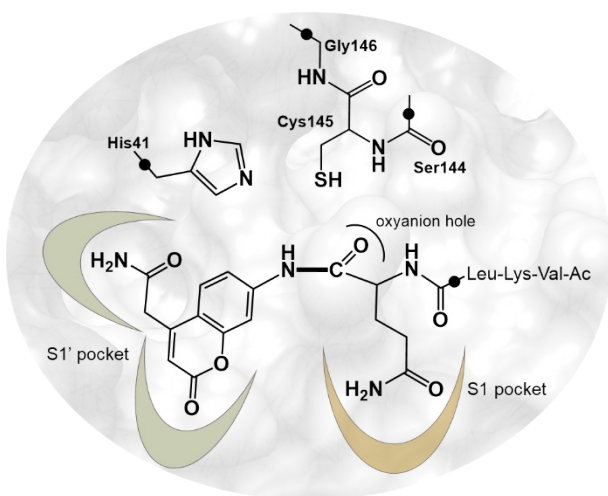

**Figure S2.** Schematic representation of the active site of SARS-CoV-2 M<sup>pro</sup> with atoms included in the QM region in QM/MM calculations. Four link atoms are indicated as black dots.

Contribution of each residue of the protein to the interaction energy with defined part of substrate was computer using the following expression:

$$E_{QM/MM}^{Int} = \sum \left\langle \Psi \left| \frac{q_{MM}}{r_{e,MM}} \right| \Psi \right\rangle + \sum \sum \frac{Z_{QM} q_{MM}}{r_{QM,MM}} + E_{QM/MM}^{vdW} \quad (S2)$$

This interaction energy can be exactly decomposed in a sum over residues provided that the polarized wave function ( $\Psi$ ) is employed to evaluate this energy contribution. The global polarization effect can be obtained from the gas phase energy difference between the polarized,  $\Psi$ , and non-polarized,  $\Psi_0$ , wave functions.

**Potential Energy Surfaces.** Potential energy surfaces (PESs) were obtained by grid scanning of distinguish reaction coordinates most suitable for describing each of the chemical step. A harmonic constraint was used to maintain the proper interatomic distances along the reaction coordinate, and a series of conjugate gradient optimizations and L-BFGS-B optimization algorithms were applied to obtain the final potential energy of the minimized constrained geometry. A micro-macro iteration optimization algorithm<sup>17,18</sup> was used to localize, optimize, and characterize the key TS structures using a Hessian matrix containing all the coordinates of the QM subsystem at M06-2X/MM level of theory with the standard 6-31+G(d,p) basis set. The gradient norm of the remaining movable atoms was maintained less than 0.01 kcal·mol<sup>-1</sup>·Å<sup>-1</sup>. Intrinsic reaction coordinates (IRCs) were traced down from located TSs to the valleys of the reactants, intermediates and products in mass-weighted Cartesian coordinates.

**Free Energy Surfaces.** FESs were obtained, in terms of Potentials of Mean Force (2D-PMF), for every step of the reaction using the Umbrella Sampling approach<sup>19</sup> combined with the Weighted Histogram Analysis Method (WHAM).<sup>20</sup> Series of MD simulations were performed adding a constraint along the selected reaction coordinates with an umbrella force constant of 2500 kJ·mol<sup>-1</sup>·Å<sup>-2</sup>. In every window QM/MM MD simulations were performed with a total of 5 ps of equilibration and 20 ps of production at 310 K with a time step of 1 fs. Structures obtained in previously computed PESs were used as starting points for the MD simulations in every window. The resulting Free Energy Surfaces are shown in Figures S3, S4 and S5 while key interatomic distances of every state involved in the reaction, optimized at M06-2X/MM are listed in Table S3.

## Spline Corrections

The generation of PMFs requires a large number of structures that are generated from QM/MM MD calculations. Inevitably, we are restricted to the use of a semiempirical Hamiltonian, AM1 in this work. Then, in order to improve the quality of our free energy surfaces, based on the work of Truhlar and co-workers for reactions in solution<sup>21,22,23</sup> a spline under tension<sup>24,25</sup> is used to interpolate this correction term at any value of the reaction coordinate,  $\xi_1$  and  $\xi_2$  in the case of two dimensional PMFs, selected to generate the free energy surfaces.<sup>26,27</sup> In this way we obtain a continuous function in a new energy function to obtain corrected PMFs:

$$E = E_{LL/MM} + S[\Delta E_{LL}^{HL}(\xi_1, \xi_2)] \quad (S3)$$

where S refers to the spline function, and its argument  $\Delta E_{LL}^{HL}(\xi_1, \xi_2)$  is a correction term evaluated from the single-point energy difference between a high-level (HL) and a low-level (LL) calculation of the QM subsystem. Herein the hybrid M06-2X functional with the 6-31+G(d,p) basis set, as suggested by Truhlar and co-workers,<sup>28,29</sup> has been employed as the HL method. As our simulations demonstrate, the corrections in the energy applied to any single chemical step, can be significant thus justifying our computational protocol, while the geometries generated from the sampling with LL calculations can be considered as representative of the HL geometries, thus giving credit to the selected technique. These calculations were carried out using the Gaussian09 program.<sup>30</sup>

It is important to point out that this method can have some limitations when the LL is not capable of describing the electronic structures of the system subject of study.<sup>31</sup> On the other side, even when the topology of the PESs are significantly different, spline corrections at high level have shown good results.<sup>32</sup> In the present study, structures optimized at the selected LL/MM combination of potentials (AM1/AMBER) were qualitatively equivalents to those later optimized at HL/MM level (M06-2X/AMBER).

**Table S1.** Atom types, charges and parameters obtained for ACC residue of the substrate inhibitor generated using anten chamber package included in AmberTools.

| Atom name         | Atom type | Charge   | Parameters    |                   |             |               |        |         |
|-------------------|-----------|----------|---------------|-------------------|-------------|---------------|--------|---------|
| N                 | nh        | -0.79555 | <u>NONBON</u> |                   |             | <u>ANGLES</u> |        |         |
| H1                | hn        | 0.437896 | nh            | 1.8240            | 0.1700      | nh-ca-ca      | 69.340 | 120.130 |
| C6                | ca        | 0.230216 | hn            | 0.6000            | 0.0157      | hn-nh-ca      | 49.080 | 116.130 |
| C5                | ca        | -0.21304 | ca            | 1.9080            | 0.0860      | ca-ca-ca      | 67.180 | 119.970 |
| C4                | ca        | -0.03882 | ha            | 1.4590            | 0.0150      | ca-ca-ha      | 48.460 | 120.010 |
| C3                | ca        | -0.20339 | os            | 1.6837            | 0.1700      | ca-ca-cd      | 65.990 | 120.100 |
| C1                | ca        | 0.21284  | c             | 1.9080            | 0.0860      | ca-ca-os      | 69.790 | 119.200 |
| C2                | ca        | -0.22725 | cc            | 1.9080            | 0.0860      | ca-cd-cc      | 68.230 | 113.510 |
| H4                | ha        | 0.170609 | cd            | 1.9080            | 0.0860      | ca-cd-c3      | 64.050 | 117.810 |
| O1                | os        | -0.30981 | c3            | 1.9080            | 0.1094      | ca-os-c       | 63.750 | 120.870 |
| C9                | c         | 0.760157 | n             | 1.8240            | 0.1700      | os-c-cc       | 70.500 | 112.300 |
| C8                | cc        | -0.24827 | o             | 1.6612            | 0.2100      | os-c-o        | 75.930 | 123.330 |
| C7                | cd        | 0.049076 | hc            | 1.4870            | 0.0157      | c-cc-cd       | 65.230 | 121.510 |
| C10               | c3        | -0.12423 | <u>BONDS:</u> |                   |             | c-cc-ha       | 46.990 | 117.020 |
| C11               | c         | 0.694125 | nh-hn         | 401.20            | 1.014       | cc-c-o        | 68.910 | 125.710 |
| N2                | n         | -0.63345 | nh-ca         | 449.00            | 1.364       | cc-cd-c3      | 64.810 | 119.450 |
| H8                | hn        | 0.333319 | ca-ca         | 478.40            | 1.387       | cd-cc-ha      | 48.350 | 122.890 |
| H9                | hn        | 0.335425 | ca-ha         | 344.30            | 1.087       | cd-c3-c       | 63.810 | 113.170 |
| O2                | o         | -0.57579 | ca-cd         | 411.70            | 1.434       | cd-c3-hc      | 47.200 | 110.860 |
| H6                | hc        | 0.09236  | ca-os         | 372.40            | 1.373       | c3-c-n        | 67.860 | 115.150 |
| H7                | hc        | 0.102892 | os-c          | 411.30            | 1.343       | c3-c-o        | 68.030 | 123.110 |
| H5                | ha        | 0.183246 | c-cc          | 377.40            | 1.462       | c-c3-hc       | 47.200 | 109.680 |
| O3                | o         | -0.53166 | c-o           | 648.00            | 1.214       | c-n-hn        | 49.210 | 118.460 |
| H3                | ha        | 0.149546 | cc-cd         | 504.00            | 1.371       | n-c-o         | 75.830 | 122.030 |
| H2                | ha        | 0.149546 | cc-ha         | 347.20            | 1.085       | hn-n-hn       | 39.730 | 117.850 |
|                   |           |          | cd-c3         | 337.30            | 1.499       | hc-c3-hc      | 39.430 | 108.350 |
|                   |           |          | c3-c          | 328.30            | 1.508       |               |        |         |
|                   |           |          | c3-hc         | 337.30            | 1.092       |               |        |         |
|                   |           |          | c-n           | 478.20            | 1.345       |               |        |         |
|                   |           |          | n-hn          | 410.20            | 1.009       |               |        |         |
| <b>Parameters</b> |           |          |               |                   |             |               |        |         |
| <u>DIHEDRALS:</u> |           |          |               | <u>IMPROPERS:</u> |             |               |        |         |
| nh-ca-ca-ca       | 1         | 3.625    | 180.000       | 2.000             | ca-ca-ca-nh | 1.1           | 180.0  | 2.0     |
| nh-ca-ca-ha       | 1         | 3.625    | 180.000       | 2.000             | ca-ca-ca-ha | 1.1           | 180.0  | 2.0     |
| hn-nh-ca-ca       | 1         | 1.050    | 180.000       | 2.000             | ca-ca-ca-cd | 1.1           | 180.0  | 2.0     |
| ca-ca-ca-ca       | 1         | 3.625    | 180.000       | 2.000             | ca-ca-ca-os | 1.1           | 180.0  | 2.0     |
| ca-ca-ca-ha       | 1         | 3.625    | 180.000       | 2.000             | cc-o-c-os   | 10.5          | 180.0  | 2.0     |
| ca-ca-ca-os       | 1         | 3.625    | 180.000       | 2.000             | c-cd-cc-ha  | 1.1           | 180.0  | 2.0     |
| ca-ca-ca-cd       | 1         | 3.625    | 180.000       | 2.000             | c3-ca-cd-cc | 1.1           | 180.0  | 2.0     |
| ca-ca-cd-cc       | 1         | 2.550    | 180.000       | 2.000             | c3-n-c-o    | 10.5          | 180.0  | 2.0     |
| ca-ca-cd-c3       | 1         | 2.550    | 180.000       | 2.000             | c-hn-n-hn   | 1.1           | 180.0  | 2.0     |
| ca-ca-os-c        | 1         | 0.900    | 180.000       | 2.000             |             |               |        |         |
| ca-cd-cc-c        | 1         | 4.000    | 180.000       | 2.000             |             |               |        |         |
| ca-cd-cc-ha       | 1         | 4.000    | 180.000       | 2.000             |             |               |        |         |
| ca-cd-c3-c        | 1         | 0.000    | 0.000         | 3.000             |             |               |        |         |
| ca-cd-c3-hc       | 1         | 0.000    | 0.000         | 3.000             |             |               |        |         |
| ca-os-c-cc        | 1         | 2.700    | 180.000       | 2.000             |             |               |        |         |
| ca-os-c-o         | 1         | 2.700    | 180.000       | 2.000             |             |               |        |         |
| ha-ca-ca-os       | 1         | 3.625    | 180.000       | 2.000             |             |               |        |         |
| os-ca-ca-cd       | 1         | 3.625    | 180.000       | 2.000             |             |               |        |         |





**Table S2.** pKa values predicted for titratable residues present in Protomer A and B of SARS-CoV-2 M<sup>pro</sup>.

| Residue | pKa <sup>calc</sup> | pKa <sup>stand</sup> | Residue | pKa <sup>calc</sup> | pKa <sup>stand</sup> | Residue | pKa <sup>calc</sup> | pKa <sup>stand</sup> |     |       |      |
|---------|---------------------|----------------------|---------|---------------------|----------------------|---------|---------------------|----------------------|-----|-------|------|
| ASP     | 33                  | 3.81                 | 3.8     | GLU                 | 14                   | 6.81    | 4.5                 | LYS                  | 5   | 9.85  | 10.5 |
| ASP     | 34                  | 3.45                 | 3.8     | GLU                 | 47                   | 4.64    | 4.5                 | LYS                  | 12  | 9.52  | 10.5 |
| ASP     | 48                  | 3.71                 | 3.8     | GLU                 | 55                   | 4.76    | 4.5                 | LYS                  | 61  | 10.85 | 10.5 |
| ASP     | 56                  | 3.77                 | 3.8     | GLU                 | 166                  | 3.17    | 4.5                 | LYS                  | 88  | 10.13 | 10.5 |
| ASP     | 92                  | 3.53                 | 3.8     | GLU                 | 178                  | 4.89    | 4.5                 | LYS                  | 90  | 10.56 | 10.5 |
| ASP     | 153                 | 3.81                 | 3.8     | GLU                 | 240                  | 6.01    | 4.5                 | LYS                  | 97  | 10.29 | 10.5 |
| ASP     | 155                 | 3.26                 | 3.8     | GLU                 | 270                  | 4.82    | 4.5                 | LYS                  | 100 | 10.81 | 10.5 |
| ASP     | 176                 | 3.74                 | 3.8     | GLU                 | 288                  | 5.2     | 4.5                 | LYS                  | 102 | 10.68 | 10.5 |
| ASP     | 187                 | 2.9                  | 3.8     | GLU                 | 290                  | 2.15    | 4.5                 | LYS                  | 137 | 9.64  | 10.5 |
| ASP     | 197                 | 3.81                 | 3.8     | HIS                 | 41                   | 3.04    | 6.5                 | LYS                  | 236 | 10.62 | 10.5 |
| ASP     | 216                 | 4.29                 | 3.8     | HIS                 | 64                   | 6.22    | 6.5                 | LYS                  | 269 | 9.97  | 10.5 |
| ASP     | 229                 | 3.61                 | 3.8     | HIS                 | 80                   | 6.58    | 6.5                 | ARG                  | 4   | 15.07 | 12.5 |
| ASP     | 245                 | 3.92                 | 3.8     | HIS                 | 163                  | -0.11   | 6.5                 | ARG                  | 40  | 14.28 | 12.5 |
| ASP     | 248                 | 4.15                 | 3.8     | HIS                 | 164                  | 4.62    | 6.5                 | ARG                  | 60  | 12.62 | 12.5 |
| ASP     | 263                 | 3.68                 | 3.8     | HIS                 | 172                  | 4.04    | 6.5                 | ARG                  | 76  | 12.82 | 12.5 |
| ASP     | 289                 | 4.08                 | 3.8     | HIS                 | 246                  | 5.43    | 6.5                 | ARG                  | 105 | 12.98 | 12.5 |
| ASP     | 295                 | 4.46                 | 3.8     | TYR                 | 37                   | 11.92   | 10                  | ARG                  | 131 | 15.58 | 12.5 |
| CYS     | 16                  | 11.72                | 9       | TYR                 | 54                   | 15.43   | 10                  | ARG                  | 188 | 12.28 | 12.5 |
| CYS     | 22                  | 10.3                 | 9       | TYR                 | 101                  | 12.69   | 10                  | ARG                  | 217 | 12.23 | 12.5 |
| CYS     | 38                  | 12.87                | 9       | TYR                 | 118                  | 13.08   | 10                  | ARG                  | 222 | 12.29 | 12.5 |
| CYS     | 44                  | 11.8                 | 9       | TYR                 | 126                  | 15.03   | 10                  | ARG                  | 279 | 12.02 | 12.5 |
| CYS     | 85                  | 11.93                | 9       | TYR                 | 154                  | 10.12   | 10                  | ARG                  | 298 | 10.79 | 12.5 |
| CYS     | 117                 | 12.98                | 9       | TYR                 | 161                  | 15.62   | 10                  |                      |     |       |      |
| CYS     | 128                 | 11.77                | 9       | TYR                 | 182                  | 13.82   | 10                  |                      |     |       |      |
| CYS     | 145                 | 16.67                | 9       | TYR                 | 209                  | 12.75   | 10                  |                      |     |       |      |
| CYS     | 156                 | 9.25                 | 9       | TYR                 | 237                  | 10.13   | 10                  |                      |     |       |      |
| CYS     | 160                 | 12.98                | 9       | TYR                 | 239                  | 12.75   | 10                  |                      |     |       |      |
| CYS     | 265                 | 12.28                | 9       |                     |                      |         |                     |                      |     |       |      |
| CYS     | 300                 | 11.81                | 9       |                     |                      |         |                     |                      |     |       |      |

## COMPUTATIONAL RESULTS

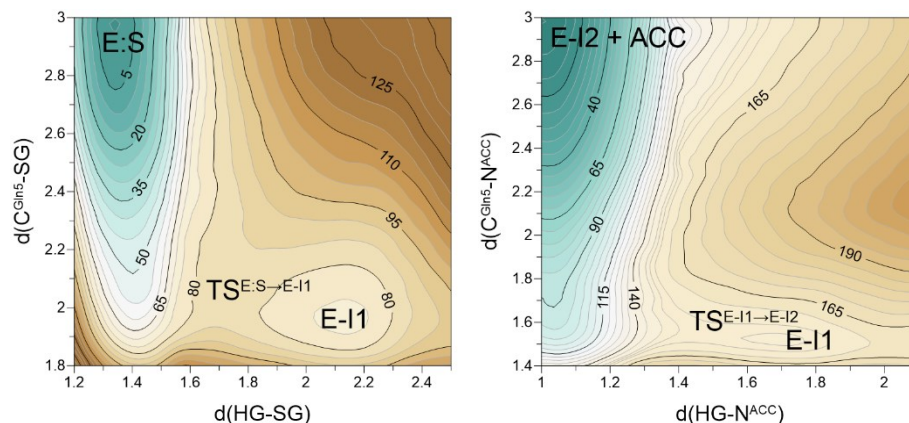

**Figure S3.** Free Energy Surfaces computed at M06-2X:AM1/MM level for acylation process catalyzed by SARS-CoV-2 M<sup>PRO</sup>. The values of energies are in  $\text{kJ}\cdot\text{mol}^{-1}$  and the distances defined on axes are given in  $\text{\AA}$ .

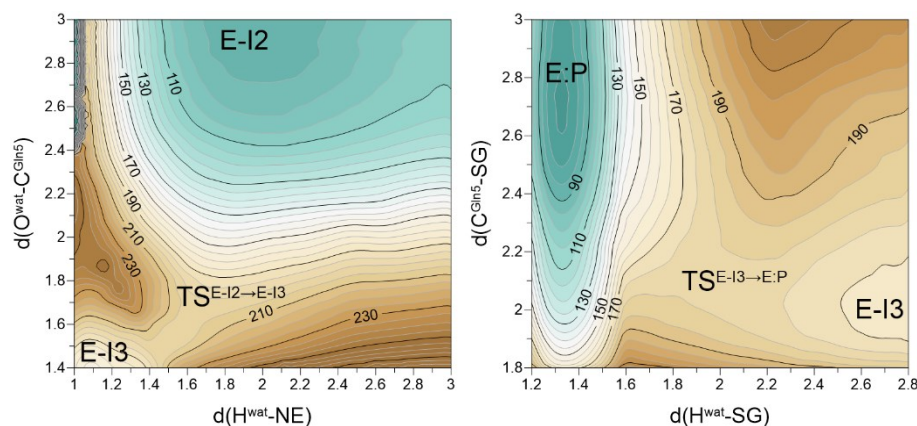

**Figure S4.** Free Energy Surfaces computed at M06-2X:AM1/MM level for deacylation process catalyzed by SARS-CoV-2 M<sup>PRO</sup>. The values of energies are in  $\text{kJ}\cdot\text{mol}^{-1}$  and the distances defined on axes are given in  $\text{\AA}$ .

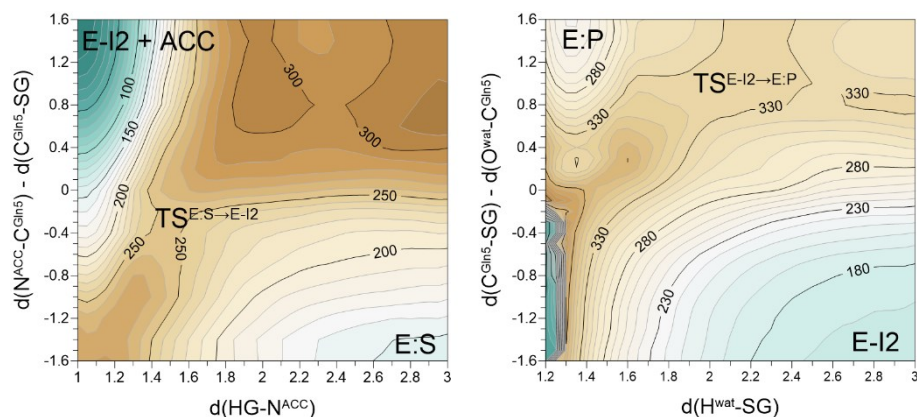

**Figure S5.** Free Energy Surfaces computed at M06-2X:AM1/MM level for concerted process of acylation and deacylation process catalyzed by SARS-CoV-2 M<sup>PRO</sup>. The values of energies are in  $\text{kJ}\cdot\text{mol}^{-1}$  and the distances defined on axes are given in  $\text{\AA}$ .

**Table S3.** Key distances (in Å) of structures of **E:S**, rate limiting step of the acylation reaction, **TS<sup>E:S</sup>→<sup>E-I1</sup>**, intermediate **E-I2**, rate limiting step of the deacylation reaction, **TS<sup>E-I2</sup>→<sup>E-I3</sup>**, and **E:P**, optimized at M06-2X/AMBER level 310 K 1 of theory.

| Distance                                               | E:S  | TS <sup>E:S</sup> → <sup>E-I1</sup> | E-I2 | TS <sup>E-I2</sup> → <sup>E-I3</sup> | E:P  |
|--------------------------------------------------------|------|-------------------------------------|------|--------------------------------------|------|
| SG <sup>Cys145</sup> -HG <sup>Cys145</sup>             | 1.36 | 1.89                                | -    | -                                    | -    |
| NE <sup>His41</sup> -HG <sup>Cys145</sup>              | 1.91 | 1.13                                | -    | -                                    | -    |
| SG <sup>Cys145</sup> -C <sup>Gln5</sup>                | 3.10 | 2.35                                | 1.76 | 1.88                                 | 2.99 |
| HG <sup>Cys145</sup> -N <sup>ACC</sup>                 | 3.30 | 2.98                                | -    | -                                    | -    |
| N <sup>ACC</sup> -C <sup>Gln5</sup>                    | 1.38 | 1.46                                | -    | -                                    | -    |
| C <sup>Gln5</sup> -O <sup>Gln5</sup>                   | 1.23 | 1.25                                | 1.22 | 1.26                                 | 1.22 |
| SG-H <sup>wat</sup>                                    | -    | -                                   | 3.07 | 2.95                                 | 1.35 |
| NE <sup>His41</sup> -H <sup>wat</sup>                  | -    | -                                   | 1.99 | 1.20                                 | 2.09 |
| H <sup>wat</sup> -O <sup>wat</sup>                     | -    | -                                   | 0.98 | 1.38                                 | 2.91 |
| C <sup>Gln5</sup> -O <sup>wat</sup>                    | -    | -                                   | 2.81 | 1.71                                 | 1.34 |
| <b>Oxyanion hole:</b>                                  |      |                                     |      |                                      |      |
| O <sup>Gln5</sup> ...H <sup>Cys145</sup>               | 2.04 | 2.03                                | 2.20 | 2.25                                 | 2.37 |
| O <sup>Gln5</sup> ...H <sup>Ser144</sup>               | 2.81 | 2.88                                | 3.25 | 3.52                                 | 3.01 |
| O <sup>Gln5</sup> ...H <sup>Gly143</sup>               | 1.83 | 1.76                                | 1.89 | 2.02                                 | 1.82 |
| <b>S1'-pocket:</b>                                     |      |                                     |      |                                      |      |
| HG <sup>Ser46</sup> ...=O <sub>X</sub> <sup>ACC</sup>  | 1.66 | 1.64                                | -    | -                                    | -    |
| HE <sup>3Met49</sup> ...=O <sub>X</sub> <sup>ACC</sup> | 3.64 | 3.68                                | -    | -                                    | -    |
| HE <sup>1Met49</sup> ...O <sub>XX</sub> <sup>ACC</sup> | 3.15 | 2.74                                | -    | -                                    | -    |
| <b>S1-pocket:</b>                                      |      |                                     |      |                                      |      |
| HE <sup>2His163</sup> ...OE <sup>1Gln5</sup>           | 1.88 | 1.89                                | 1.84 | 1.82                                 | 1.81 |
| HB <sup>3Phe140</sup> ...OE <sup>1Gln5</sup>           | 2.84 | 2.87                                | 3.07 | 3.12                                 | 2.98 |
| O <sup>Phe140</sup> ...HE <sup>22Gln5</sup>            | 2.59 | 2.69                                | 3.24 | 3.33                                 | 3.15 |
| O <sup>Phe140</sup> ...HE <sup>21Gln5</sup>            | 4.10 | 3.45                                | 4.46 | 4.51                                 | 4.33 |
| OE <sup>1Glu166</sup> ...HE <sup>22Gln5</sup>          | 3.45 | 3.45                                | 1.82 | 1.90                                 | 1.81 |
| OE <sup>1Glu166</sup> ...HE <sup>21Gln5</sup>          | 3.65 | 3.80                                | 3.28 | 5.41                                 | 3.23 |
| ND <sup>2Asn142</sup> ...HA <sup>Gln5</sup>            | 2.25 | 2.41                                | 3.74 | 3.68                                 | 3.21 |
| OD <sup>1Asn142</sup> ...HE <sup>21Gln5</sup>          | 4.10 | 3.95                                | 2.87 | 2.79                                 | 3.02 |
| O <sup>His164</sup> ...H <sup>Gln5</sup> (backbone)    | 2.24 | 2.11                                | 1.91 | 1.95                                 | 2.04 |

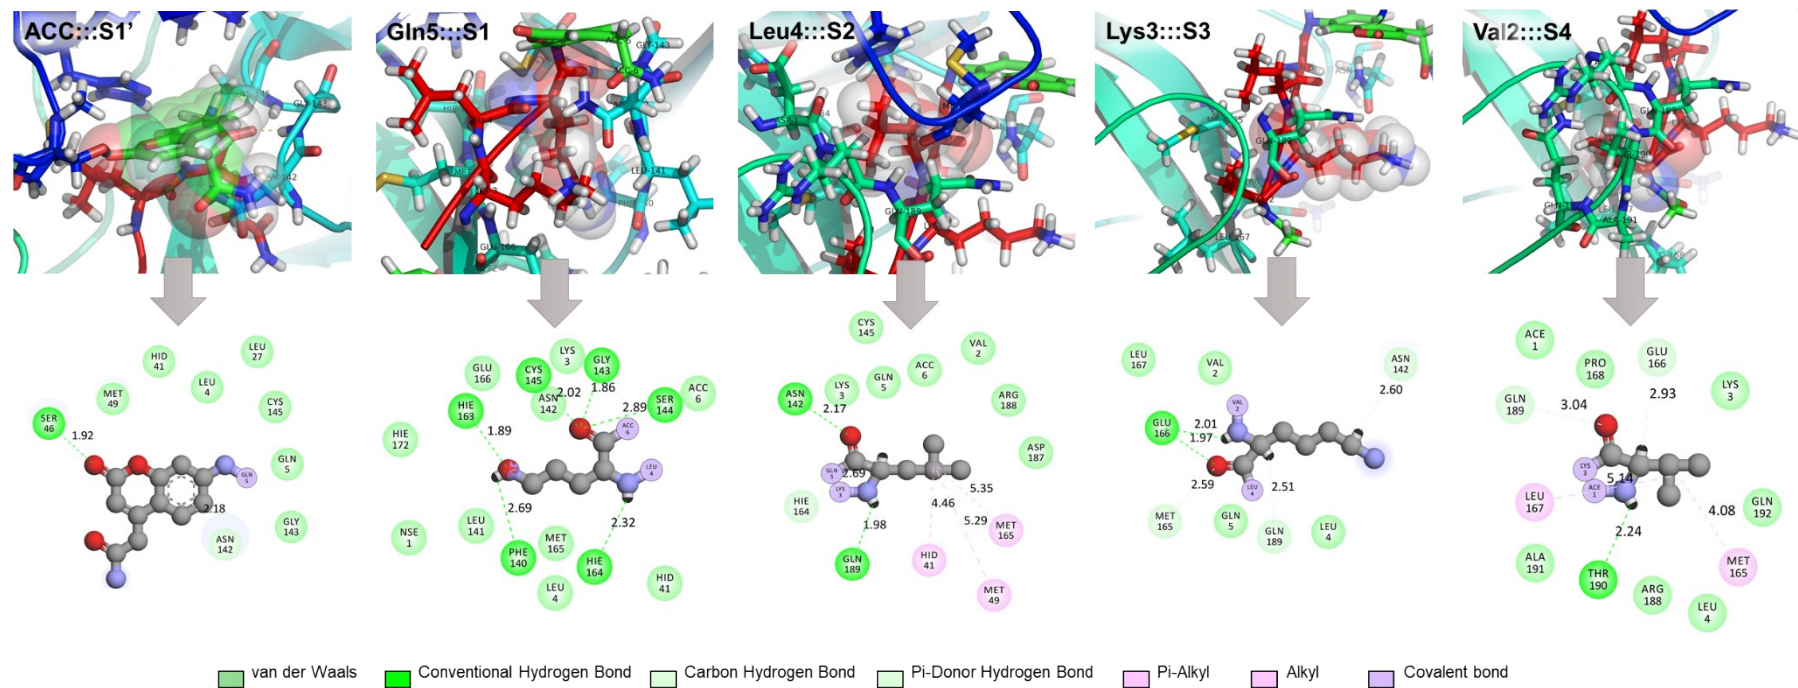

**Figure S6.** Structural representation of each binding pocket for the **E:S** structure optimized at M06-2X/MM level (top) and schematic representation of the specific interactions (bottom).

**Table S4.** Non-bonding interaction energies ( $E_{\text{int}}$ ) between substrate and its binding pockets, decomposed in the contribution from electrostatic ( $E_{\text{elec}}$ ) and Lennard-Jones ( $E_{\text{LJ}}$ ) interactions, obtained as an average over 1000 structures from the AM1/MM MD simulation. Only those residues interacting with the substrate with  $E_{\text{int}}$  higher than 3 kcal·mol<sup>-1</sup> are reported. All values in kcal·mol<sup>-1</sup>.

| Residue #       | $E_{\text{int}}$ | $E_{\text{elec}}$ | $E_{\text{LJ}}$ | Residue #       | $E_{\text{int}}$ | $E_{\text{elec}}$ | $E_{\text{LJ}}$ |
|-----------------|------------------|-------------------|-----------------|-----------------|------------------|-------------------|-----------------|
| <b>ACC::S1'</b> |                  |                   |                 | <b>Leu4::S2</b> |                  |                   |                 |
| 41              | 3.34 ± 0.48      | 4.12              | -0.78           | 142             | -5.60 ± 2.22     | -4.99             | -0.62           |
| 46              | -3.94 ± 2.85     | -2.72             | -1.22           | 165             | -6.54 ± 0.81     | -4.25             | -2.29           |
| 49              | -4.30 ± 0.83     | -2.63             | -1.67           | 166             | 15.14 ± 1.69     | 15.55             | -0.41           |
| 142             | -19.09 ± 1.95    | -14.72            | -4.38           | 188             | -4.68 ± 0.62     | -3.13             | -1.54           |
| 143             | -5.79 ± 0.78     | -4.80             | -1.00           |                 |                  |                   |                 |
| 144             | -3.93 ± 0.73     | -3.66             | -0.27           | <b>Lys3::S3</b> |                  |                   |                 |
| 145             | -5.63 ± 2.11     | -4.81             | -0.82           | 165             | -3.87 ± 0.65     | -2.96             | -0.9            |
| 164             | 4.57 ± 0.73      | 4.71              | -0.14           | 166             | -11.45 ± 1.96    | -9.38             | -2.1            |
| 166             | 7.44 ± 0.68      | 7.46              | -0.03           | 189             | -8.50 ± 1.17     | -6.31             | -2.2            |
| 187             | 4.70 ± 0.64      | 4.72              | -0.02           |                 |                  |                   |                 |
|                 |                  |                   |                 | <b>Val2::S4</b> |                  |                   |                 |
| <b>Gln5::S1</b> |                  |                   |                 | 166             | 8.59 ± 1.57      | 9.74              | -1.1            |
| 27              | -3.01 ± 0.26     | -2.67             | -0.34           | 167             | -4.94 ± 0.86     | -3.00             | -1.9            |
| 41              | 4.49 ± 0.87      | 5.02              | -0.52           | 168             | -4.27 ± 0.55     | -3.13             | -1.1            |
| 140             | -5.70 ± 0.90     | -3.94             | -1.77           | 188             | -5.60 ± 0.76     | -4.96             | -0.6            |
| 142             | -16.83 ± 1.49    | -13.44            | -3.39           | 189             | -3.46 ± 1.46     | -1.01             | -2.5            |
| 143             | -10.31 ± 0.89    | -9.52             | -0.79           | 190             | 6.47 ± 1.43      | 7.67              | -1.2            |
| 144             | -8.17 ± 1.78     | -6.98             | -1.19           |                 |                  |                   |                 |
| 145             | -5.47 ± 2.17     | -5.25             | -0.22           |                 |                  |                   |                 |
| 163             | -12.08 ± 1.12    | -11.46            | -0.62           |                 |                  |                   |                 |
| 164             | 4.87 ± 0.80      | 6.00              | -1.13           |                 |                  |                   |                 |
| 165             | -3.25 ± 1.37     | -1.68             | -1.57           |                 |                  |                   |                 |
| 166             | 4.50 ± 1.97      | 6.71              | -2.21           |                 |                  |                   |                 |
| 172             | -4.16 ± 0.61     | -3.59             | -0.57           |                 |                  |                   |                 |
| 187             | 6.52 ± 0.96      | 6.55              | -0.03           |                 |                  |                   |                 |
| 189             | 3.84 ± 0.49      | 3.95              | -0.12           |                 |                  |                   |                 |

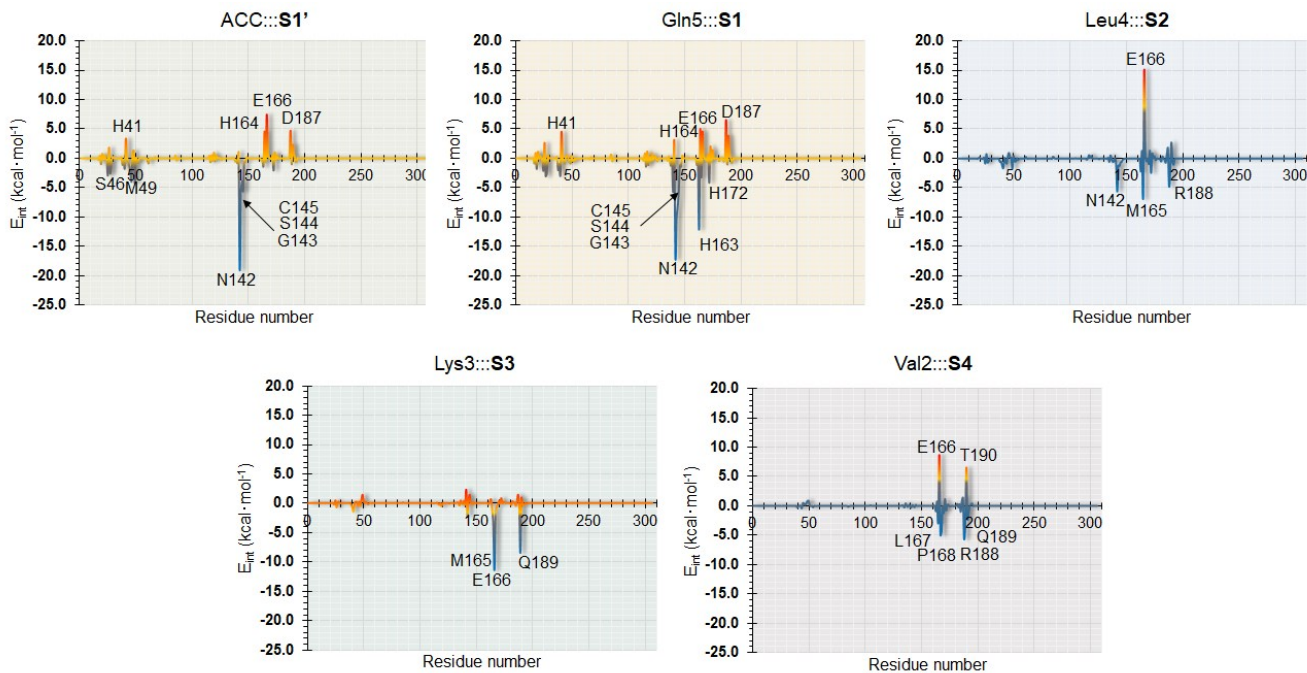

**Figure S7.** Non-bonding interaction energy between residues of Chain-A and each fragment of substrate, obtained as an average over 1000 structures of the AM1/MM MD simulations.

## COORDINATES OF TS STRUCTURES

**Table S5.** Cartesian coordinates (in Å) of QM atoms for Transition State structures optimized at M06-2X/MM level for the rate limiting step of the acylation and deacylation reactions.

| TS <sup>E-S→E-I1</sup> ( $\nu_i = -111.3 \text{ cm}^{-1}$ ) |          |          |          | TS <sup>E-I2→E-I3</sup> ( $\nu_i = -695.4 \text{ cm}^{-1}$ ) |          |          |          |
|-------------------------------------------------------------|----------|----------|----------|--------------------------------------------------------------|----------|----------|----------|
| Atoms                                                       | x        | y        | z        | Atoms                                                        | x        | y        | z        |
| C                                                           | 4.038663 | 7.015889 | 25.21455 | C                                                            | 25.62189 | 7.18704  | -3.24642 |
| H                                                           | 3.331241 | 6.453941 | 25.83161 | H                                                            | 25.9585  | 6.652549 | -2.35282 |
| H                                                           | 5.033165 | 6.776299 | 25.60086 | H                                                            | 26.31448 | 6.891638 | -4.04083 |
| C                                                           | 3.9481   | 6.559066 | 23.78876 | C                                                            | 24.24477 | 6.688861 | -3.65688 |
| N                                                           | 2.825861 | 5.90821  | 23.29606 | N                                                            | 23.42177 | 5.984296 | -2.79043 |
| H                                                           | 1.978411 | 5.695413 | 23.81195 | H                                                            | 23.59963 | 5.804492 | -1.80886 |
| C                                                           | 3.063007 | 5.502348 | 22.0409  | C                                                            | 22.35365 | 5.514602 | -3.45697 |
| H                                                           | 2.387003 | 4.945744 | 21.40984 | H                                                            | 21.55552 | 4.917151 | -3.04048 |
| N                                                           | 4.281811 | 5.876163 | 21.70156 | N                                                            | 22.43157 | 5.882131 | -4.72665 |
| H                                                           | 4.644013 | 5.571002 | 20.67908 | H                                                            | 21.60726 | 5.547813 | -5.53707 |
| C                                                           | 4.858921 | 6.530869 | 22.76555 | C                                                            | 23.6026  | 6.609346 | -4.87065 |
| H                                                           | 5.871283 | 6.904469 | 22.72479 | H                                                            | 23.91567 | 7.008036 | -5.82231 |
| C                                                           | 4.635634 | 4.883631 | 14.24618 | C                                                            | 14.6899  | 5.117649 | -4.51793 |
| O                                                           | 3.492918 | 4.928667 | 13.78504 | O                                                            | 14.26985 | 5.108881 | -3.35792 |
| N                                                           | 4.835124 | 4.997355 | 15.57558 | N                                                            | 15.99875 | 5.361805 | -4.74329 |
| H                                                           | 5.772389 | 4.93461  | 15.96156 | H                                                            | 16.37804 | 5.414149 | -5.6834  |
| C                                                           | 3.798969 | 5.510856 | 16.45986 | C                                                            | 16.81662 | 5.857854 | -3.65462 |
| H                                                           | 3.044071 | 4.743376 | 16.66178 | H                                                            | 16.81396 | 5.12517  | -2.84231 |
| C                                                           | 4.446504 | 5.97909  | 17.77229 | C                                                            | 18.24672 | 6.092391 | -4.11988 |
| H                                                           | 3.83122  | 6.775049 | 18.19671 | H                                                            | 18.7593  | 6.719555 | -3.38872 |
| H                                                           | 5.425942 | 6.413936 | 17.5356  | H                                                            | 18.26311 | 6.595204 | -5.09332 |
| S                                                           | 4.62024  | 4.679687 | 19.01415 | S                                                            | 19.15236 | 4.546278 | -4.25003 |
| C                                                           | 3.150582 | 6.756443 | 15.84324 | C                                                            | 16.28503 | 7.194046 | -3.12899 |
| O                                                           | 3.892842 | 7.656108 | 15.42515 | O                                                            | 15.87867 | 8.049782 | -3.92444 |
| N                                                           | 1.82634  | 6.826331 | 15.89386 | N                                                            | 16.38593 | 7.357536 | -1.81421 |
| H                                                           | 1.31276  | 6.043972 | 16.29258 | H                                                            | 16.69938 | 6.564237 | -1.26065 |
| C                                                           | 1.062872 | 7.933632 | 15.28129 | C                                                            | 15.74783 | 8.494739 | -1.12452 |
| H                                                           | 1.683473 | 8.824475 | 15.35657 | H                                                            | 15.87048 | 9.36594  | -1.76722 |
| H                                                           | 0.178117 | 8.090237 | 15.90134 | H                                                            | 16.31164 | 8.672597 | -0.20664 |
| C                                                           | 6.706643 | 1.954986 | 21.43024 | C                                                            | 21.71333 | 2.113192 | -6.47977 |
| O                                                           | 7.929051 | 1.846056 | 21.56081 | O                                                            | 21.79872 | 2.250067 | -7.70894 |
| N                                                           | 6.148741 | 2.535559 | 20.35125 | N                                                            | 20.62428 | 2.424839 | -5.77877 |
| H                                                           | 5.13253  | 2.5077   | 20.24784 | H                                                            | 20.63405 | 2.304942 | -4.76415 |
| C                                                           | 6.944356 | 2.808227 | 19.15798 | C                                                            | 19.42548 | 2.887435 | -6.4414  |
| H                                                           | 7.986481 | 2.618416 | 19.45567 | H                                                            | 19.63447 | 2.838892 | -7.51432 |
| C                                                           | 6.561301 | 1.848087 | 18.0263  | C                                                            | 18.23986 | 1.967716 | -6.09073 |
| H                                                           | 5.504499 | 1.989589 | 17.77634 | H                                                            | 18.03967 | 2.009992 | -5.01558 |
| H                                                           | 7.122048 | 2.125517 | 17.12803 | H                                                            | 17.34156 | 2.35152  | -6.58892 |

|   |          |          |          |   |          |          |          |
|---|----------|----------|----------|---|----------|----------|----------|
| C | 6.834442 | 0.378575 | 18.37025 | C | 18.51535 | 0.520709 | -6.52008 |
| H | 7.897394 | 0.215419 | 18.58695 | H | 18.66976 | 0.445099 | -7.60563 |
| C | 6.39362  | -0.52955 | 17.22947 | C | 17.45794 | -0.47625 | -6.06488 |
| N | 7.119079 | -1.65448 | 17.01995 | N | 17.23091 | -1.519   | -6.89248 |
| H | 6.791665 | -2.27297 | 16.28867 | H | 16.70354 | -2.32851 | -6.5506  |
| H | 7.751611 | -2.05749 | 17.70388 | H | 17.72879 | -1.60377 | -7.76786 |
| O | 5.440089 | -0.24952 | 16.50573 | O | 16.87946 | -0.37315 | -4.98299 |
| H | 6.280482 | 0.067659 | 19.26767 | H | 19.44871 | 0.169338 | -6.05686 |
| C | 6.909562 | 4.279786 | 18.68721 | C | 19.17256 | 4.371687 | -6.12648 |
| N | 7.41898  | 5.260393 | 19.64072 | O | 18.28878 | 4.969156 | -6.7902  |
| H | 7.368011 | 6.14312  | 19.13324 | O | 20.68269 | 5.095624 | -6.4587  |
| C | 8.774958 | 5.092503 | 20.10136 | H | 20.38865 | 5.78843  | -7.06781 |
| C | 9.901314 | 5.302202 | 19.27964 | H | 22.45687 | 1.729908 | -5.93182 |
| C | 11.18516 | 5.157512 | 19.79906 | H | 14.78744 | 8.328946 | -0.90055 |
| C | 11.39715 | 4.814802 | 21.1481  | H | 14.07455 | 4.977584 | -5.29364 |
| C | 10.25583 | 4.692223 | 21.95434 | H | 25.77187 | 8.16235  | -3.08433 |
| C | 8.96577  | 4.795372 | 21.44231 |   |          |          |          |
| H | 8.119727 | 4.648796 | 22.10275 |   |          |          |          |
| O | 10.33684 | 4.486814 | 23.29261 |   |          |          |          |
| C | 11.53322 | 4.403305 | 23.932   |   |          |          |          |
| C | 12.7343  | 4.36493  | 23.10857 |   |          |          |          |
| C | 12.69539 | 4.559755 | 21.77185 |   |          |          |          |
| C | 13.94579 | 4.399962 | 20.94691 |   |          |          |          |
| H | 14.82414 | 4.67954  | 21.53802 |   |          |          |          |
| C | 14.15272 | 2.924671 | 20.58899 |   |          |          |          |
| N | 14.39212 | 2.635359 | 19.29898 |   |          |          |          |
| H | 14.36432 | 3.324577 | 18.55507 |   |          |          |          |
| H | 14.66676 | 1.687352 | 19.07343 |   |          |          |          |
| O | 14.12273 | 2.05524  | 21.45743 |   |          |          |          |
| H | 13.95581 | 5.040906 | 20.06409 |   |          |          |          |
| H | 13.66187 | 4.169027 | 23.63567 |   |          |          |          |
| O | 11.49709 | 4.369492 | 25.14598 |   |          |          |          |
| H | 12.03599 | 5.32914  | 19.14722 |   |          |          |          |
| H | 9.772526 | 5.615352 | 18.24748 |   |          |          |          |
| O | 7.068583 | 4.525456 | 17.47088 |   |          |          |          |
| H | 6.092275 | 1.607575 | 22.13866 |   |          |          |          |
| H | 0.78787  | 7.77105  | 14.33369 |   |          |          |          |
| H | 5.43296  | 4.82554  | 13.64543 |   |          |          |          |
| H | 3.856218 | 7.983317 | 25.39004 |   |          |          |          |



**Table S6.** Cartesian coordinates (in Å) of QM atoms for Transition State structures of the concerted acylation and deacylation reactions optimized at M06-2X/MM level.

| TSE:S→E-I2 ( $\nu_i = -1503.9 \text{ cm}^{-1}$ ) |          |          |          | TSE-I2→E:P ( $\nu_i = -1453.9 \text{ cm}^{-1}$ ) |          |          |          |
|--------------------------------------------------|----------|----------|----------|--------------------------------------------------|----------|----------|----------|
| Atoms                                            | x        | y        | z        | Atoms                                            | x        | y        | z        |
| C                                                | 3.995381 | 7.050899 | 25.39507 | C                                                | 25.80598 | 7.272366 | -3.0572  |
| H                                                | 3.154854 | 6.513588 | 25.84346 | H                                                | 26.18773 | 6.772918 | -2.16311 |
| H                                                | 4.87253  | 6.796992 | 25.99765 | H                                                | 26.46166 | 6.970456 | -3.87888 |
| C                                                | 4.23526  | 6.61029  | 23.98727 | C                                                | 24.41075 | 6.811036 | -3.36732 |
| N                                                | 3.294112 | 5.934879 | 23.24173 | N                                                | 23.61184 | 6.131248 | -2.47207 |
| H                                                | 2.368722 | 5.66151  | 23.54511 | H                                                | 23.84119 | 5.884264 | -1.51763 |
| C                                                | 3.869554 | 5.592973 | 22.05846 | C                                                | 22.46498 | 5.785872 | -3.11958 |
| H                                                | 3.348576 | 5.034873 | 21.29383 | H                                                | 21.67419 | 5.225425 | -2.64198 |
| N                                                | 5.113516 | 6.015335 | 21.99026 | N                                                | 22.46795 | 6.203987 | -4.36549 |
| H                                                | 5.898964 | 5.175614 | 19.92482 | H                                                | 20.40664 | 5.172113 | -5.57074 |
| C                                                | 5.351005 | 6.648087 | 23.18808 | C                                                | 23.67678 | 6.839905 | -4.52853 |
| H                                                | 6.31149  | 7.087575 | 23.42203 | H                                                | 23.9716  | 7.278382 | -5.47091 |
| C                                                | 4.616913 | 4.915418 | 14.24536 | C                                                | 14.7577  | 5.100952 | -4.53093 |
| O                                                | 3.479142 | 4.971294 | 13.78019 | O                                                | 14.35337 | 5.066764 | -3.36828 |
| N                                                | 4.817173 | 5.010714 | 15.58197 | N                                                | 16.06971 | 5.318901 | -4.78328 |
| H                                                | 5.76443  | 4.964686 | 15.93917 | H                                                | 16.37531 | 5.426557 | -5.74368 |
| C                                                | 3.79607  | 5.532697 | 16.4848  | C                                                | 16.93462 | 5.839136 | -3.73638 |
| H                                                | 3.033582 | 4.772301 | 16.68844 | H                                                | 17.02845 | 5.099657 | -2.93502 |
| C                                                | 4.467234 | 5.979076 | 17.79458 | C                                                | 18.31131 | 6.160956 | -4.31363 |
| H                                                | 3.85283  | 6.745014 | 18.2721  | H                                                | 18.84262 | 6.833087 | -3.63705 |
| H                                                | 5.433276 | 6.440058 | 17.55458 | H                                                | 18.21201 | 6.658509 | -5.28554 |
| S                                                | 4.66197  | 4.635136 | 19.00092 | S                                                | 19.33772 | 4.68266  | -4.45666 |
| C                                                | 3.151969 | 6.788448 | 15.86656 | C                                                | 16.36698 | 7.150242 | -3.16696 |
| O                                                | 3.910882 | 7.676483 | 15.45355 | O                                                | 15.94987 | 8.007872 | -3.95656 |
| N                                                | 1.82766  | 6.8556   | 15.88024 | N                                                | 16.43872 | 7.288558 | -1.84983 |
| H                                                | 1.30657  | 6.083114 | 16.28914 | H                                                | 16.77795 | 6.500198 | -1.30113 |
| C                                                | 1.070964 | 7.960973 | 15.24711 | C                                                | 15.80834 | 8.429009 | -1.14786 |
| H                                                | 1.697123 | 8.847934 | 15.31799 | H                                                | 15.94553 | 9.307182 | -1.77841 |
| H                                                | 0.188042 | 8.132336 | 15.86625 | H                                                | 16.3737  | 8.583468 | -0.22675 |
| C                                                | 6.705042 | 1.92804  | 21.41821 | C                                                | 21.65289 | 2.143518 | -6.52697 |
| O                                                | 7.928196 | 1.855926 | 21.55028 | O                                                | 21.77806 | 2.306974 | -7.74641 |
| N                                                | 6.127205 | 2.441367 | 20.30715 | N                                                | 20.51214 | 2.40936  | -5.87459 |
| H                                                | 5.108422 | 2.392621 | 20.22666 | H                                                | 20.4792  | 2.263892 | -4.86218 |
| C                                                | 6.905048 | 2.652398 | 19.09272 | C                                                | 19.29997 | 2.737735 | -6.59654 |
| H                                                | 7.954481 | 2.477072 | 19.37787 | H                                                | 19.52585 | 2.562092 | -7.65658 |
| C                                                | 6.498815 | 1.677835 | 17.98451 | C                                                | 18.14355 | 1.840329 | -6.15204 |
| H                                                | 5.436036 | 1.819803 | 17.75809 | H                                                | 17.96531 | 1.964861 | -5.07771 |
| H                                                | 7.040703 | 1.947962 | 17.07245 | H                                                | 17.22992 | 2.161114 | -6.66518 |
| C                                                | 6.774577 | 0.210058 | 18.32914 | C                                                | 18.46292 | 0.380999 | -6.49404 |
| H                                                | 7.836319 | 0.051458 | 18.55435 | H                                                | 18.65865 | 0.279851 | -7.57106 |

|   |          |          |          |   |          |          |          |
|---|----------|----------|----------|---|----------|----------|----------|
| C | 6.354897 | -0.67229 | 17.15886 | C | 17.39036 | -0.59918 | -6.05125 |
| N | 7.082955 | -1.78705 | 16.9246  | N | 17.16603 | -1.63946 | -6.87848 |
| H | 6.779373 | -2.36707 | 16.1516  | H | 16.63413 | -2.44761 | -6.53713 |
| H | 7.706312 | -2.21501 | 17.60405 | H | 17.69389 | -1.74499 | -7.73347 |
| O | 5.416486 | -0.3643  | 16.42568 | O | 16.78949 | -0.47395 | -4.98389 |
| H | 6.210658 | -0.10954 | 19.21743 | H | 19.3824  | 0.06662  | -5.97968 |
| C | 6.863598 | 4.094523 | 18.55682 | C | 18.99031 | 4.23112  | -6.50523 |
| N | 7.219383 | 5.166752 | 19.56866 | O | 18.00365 | 4.757963 | -7.02145 |
| H | 7.207312 | 6.021934 | 19.00539 | O | 20.32361 | 4.976686 | -6.81818 |
| C | 8.556856 | 5.08041  | 20.14674 | H | 20.05404 | 5.791046 | -7.27701 |
| C | 9.669498 | 5.283419 | 19.31107 | H | 22.38715 | 1.773365 | -5.95789 |
| C | 10.95346 | 5.170239 | 19.82705 | H | 14.84456 | 8.281252 | -0.92585 |
| C | 11.1692  | 4.867467 | 21.18346 | H | 14.13481 | 5.006112 | -5.30746 |
| C | 10.03476 | 4.761114 | 22.00621 | H | 25.91966 | 8.257568 | -2.92892 |
| C | 8.730877 | 4.838028 | 21.49977 |   |          |          |          |
| H | 7.881354 | 4.717762 | 22.16409 |   |          |          |          |
| O | 10.14683 | 4.589761 | 23.34814 |   |          |          |          |
| C | 11.36569 | 4.527422 | 23.96617 |   |          |          |          |
| C | 12.54901 | 4.47238  | 23.12072 |   |          |          |          |
| C | 12.4846  | 4.646899 | 21.78539 |   |          |          |          |
| C | 13.7314  | 4.517721 | 20.9503  |   |          |          |          |
| H | 14.59054 | 4.901877 | 21.5126  |   |          |          |          |
| C | 14.05278 | 3.044183 | 20.67657 |   |          |          |          |
| N | 14.42332 | 2.724597 | 19.42625 |   |          |          |          |
| H | 14.41478 | 3.382569 | 18.65516 |   |          |          |          |
| H | 14.7896  | 1.794539 | 19.26657 |   |          |          |          |
| O | 13.99963 | 2.213058 | 21.57988 |   |          |          |          |
| H | 13.69265 | 5.101756 | 20.03017 |   |          |          |          |
| H | 13.48745 | 4.29701  | 23.63636 |   |          |          |          |
| O | 11.37518 | 4.532437 | 25.17833 |   |          |          |          |
| H | 11.79899 | 5.340288 | 19.16916 |   |          |          |          |
| H | 9.531526 | 5.5592   | 18.26992 |   |          |          |          |
| O | 7.131735 | 4.346159 | 17.37846 |   |          |          |          |
| H | 6.095214 | 1.591237 | 22.13562 |   |          |          |          |
| H | 0.795223 | 7.791622 | 14.30092 |   |          |          |          |
| H | 5.415477 | 4.852096 | 13.64679 |   |          |          |          |
| H | 3.815456 | 8.028248 | 25.5065  |   |          |          |          |

## REFERENCES

- (1) Z. Jin et al. Nature 2020 <https://doi.org/10.1038/s41586-020-2223-y>.
- (2) W. Rut, K. Groborz, L. Zhang, X. Sun, M. Zmudzinski, R. Hilgenfeld, M. Drag bioRxiv, 2020, preprint, DOI: <https://doi.org/10.1101/2020.03.07.981928>.
- (3) J. Wang, W. Wang, P. A. Kollman, D. A. Case, *J. Mol. Graph. Model.* 2020, **25**, 247260.
- (4) M. H. M. Olsson, C. R. SØndergaard, M. Rostkowski, J. H. Jensen, *J. Chem. Theory Comput.* 2011, **7**, 525–537.
- (5) C. R. SØndergaard, M. H. M. Olsson, M. Rostkowski, J. H. Jensen, *J. Chem. Theory Comput.* 2011, **7**, 2284–2295.
- (6) W. L. Jorgensen, J. Chandrasekhar, J. D. Madura, R. W. Impey, M. L. Klein, *J. Chem. Phys.* 1983, **79**, 926–935.
- (7) W. E. I. Zhang, *J. Comput. Chem.* 2003, **24**, 1999–2012.
- (8) J. C. Phillips, *J. Comput. Chem.* 2005, **26**, 1781–1802.
- (9) G. S. Grest, K. Kremer, *Phys. Rev. A*, 1986, **33**, 3628–3631.
- (10) D. R. Roe, T. E. Cheatham, III *J. Chem. Theory Comput.* 2013, **7**, 3084–3095.
- (11) M. J. Field, M. Albe, C. Bret, M. F. Proust-De Martin, A. Thomas, *J. Comput. Chem.* 2000, **21**, 1088–1100.
- (12) A. Krzeminska, P. Paneth, V. Moliner, K. Świderek, *J. Phys. Chem. B*. 2015, **119**, 917–927.
- (13) M. J. Field, P. A. Bash, M. Karplus, *M. J. Comput. Chem.* 1990, **11**, 700–733.
- (14) M. J. S. Dewar, E. G. Zoebisch, E. F. Healy, J. J. P. Stewart, *J. Am. Chem. Soc.* 1985, **107**, 3902–3909.
- (15) Y. Zhao, D. G. Truhlar, *Theor. Chem. Acc.* 2008, **120**, 215–241.
- (16) M. J. Frisch, G. W. Trucks, H. B. Schlegel, G. E. Scuseria, M. A. Robb, J. R. Cheeseman, G. Scalmani, V. Barone, G. A. Petersson, H. Nakatsuji, X. Li, M. Caricato, A. Marenich, J. Bloino, B. G. Janesko, R. Gomperts, B. Mennucci, H. P. Hratchian, J. V. Ortiz, A. F. Izmaylov, J. L. Sonnenberg, D. Williams-Young, F. Ding, F. Lipparini, F. Egidi, J. Goings, B. Peng, A. Petrone, T. Henderson, D. Ranasinghe, V. G. Zakrzewski, J. Gao, N. Rega, G. Zheng, W. Liang, M. Hada, M. Ehara, K. Toyota, R. Fukuda, J. Hasegawa, M. Ishida, T. Nakajima, Y. Honda, O. Kitao, H. Nakai, T. Vreven, K. Throssell, J. A. Montgomery, Jr., J. E. Peralta, F. Ogliaro, M. Bearpark, J. J. Heyd, E. Brothers, K. N. Kudin, V. N. Staroverov, T. Keith, R. Kobayashi, J. Normand, K. Raghavachari, A. Rendell, J. C. Burant, S. S. Iyengar, J. Tomasi, M. Cossi, J. M. Millam, M. Klene, C. Adamo, R. Cammi, J. W. Ochterski, R. L. Martin, K. Morokuma, O. Farkas, J. B. Foresman, and D. J. Fox, Gaussian, Inc., Wallingford CT, 2016. Gaussian 09, Gaussian, Inc.: Wallingford, CT, 2009.
- (17) A. Turner, V. Moliner, I. H. Williams, *Phys. Chem. Chem. Phys.* 1999, **1**, 1323–1331.
- (18) S. Martí, V. Moliner, I. Tuñón, I. *J. Chem. Theory Comput.* 2005, **1**, 1008–1016.
- (19) G. M. Torrie, J. P. Valleau, *J. Comput. Phys.* 1977, **23**, 187–199.
- (20) S. Kumar, D. Bouzida, R. H. Swendsen, P. A. Kollman, J. M. Rosenberg, *J. Comput. Chem.* 1992, **13**, 1011–1021.
- (21) K. A. Nguyen, I. Rossi, D. G. Truhlar *J. Chem. Phys.* 1995, **103**, 5522–5530.
- (22) J. C. Corchado, E. L. Coitiño, Y. Chuang, P. L. Fast, D. G. Truhlar *J. Phys. Chem. A* 1998, **102**, 2424–2438.
- (23) Y. Y. Chuang, J. C. Corchado, D. G. Truhlar *J. Phys. Chem. A* 1999, **103**, 1140–1149.
- (24) R. J. Renka, *SIAM J. Stat. Comput.* 1987, **8**, 393–415.
- (25) R. J. Renka, *ACM Trans. Math. Software* 1993, **19**, 81–94.
- (26) J. J. Ruiz-Pernia, E. Silla, I. Tuñón, S. Martí, V. Moliner *J. Phys. Chem. B* 2004, **108**, 8427–8433.
- (27) J. J. Ruiz-Pernia, E. Silla, I. Tuñón, S. Martí, *J. Phys. Chem. B*. 2006, **110**, 17663–17670.
- (28) Y. Zhao, D. G. Truhlar *Theor. Chem. Acc.* 2008, **120**, 215–241.
- (29) B. J. Lynch, Y. Zhao, D. G. Truhlar *J. Phys. Chem. A* 2003, **107**, 1384–1388.
- (30) Gaussian 09, Revision E.01, M. J. Frisch, G. W. Trucks, H. B. Schlegel, G. E. Scuseria, M. A. Robb, J. R. Cheeseman, G. Scalmani, V. Barone, B. Mennucci, G. A. Petersson, H. Nakatsuji, M. Caricato, X. Li, H. P. Hratchian, A. F. Izmaylov, J. Bloino, G. Zheng, J. L. Sonnenberg, M. Hada, M. Ehara, K. Toyota, R. Fukuda, J. Hasegawa, M. Ishida, T. Nakajima, Y. Honda, O. Kitao, H. Nakai, T. Vreven, J. A. Montgomery, Jr., J. E. Peralta, F. Ogliaro, M. Bearpark, J. J. Heyd, E. Brothers, K. N. Kudin, V. N. Staroverov, R. Kobayashi, J. Normand, K.

---

Raghavachari, A. Rendell, J. C. Burant, S. S. Iyengar, J. Tomasi, M. Cossi, N. Rega, J. M. Millam, M. Klene, J. E. Knox, J. B. Cross, V. Bakken, C. Adamo, J. Jaramillo, R. Gomperts, R. E. Stratmann, O. Yazyev, A. J. Austin, R. Cammi, C. Pomelli, J. W. Ochterski, R. L. Martin, K. Morokuma, V. G. Zakrzewski, G. A. Voth, P. Salvador, J. J. Dannenberg, S. Dapprich, A. D. Daniels, Ö. Farkas, J. B. Foresman, J. V. Ortiz, J. Cioslowski, and D. J. Fox, Gaussian, Inc., Wallingford CT, 2009.

(31) S. Martí, V. Moliner, K. Świderek *Theor. Chem. Acc.* 2019, **138**:120.

(32) K. Świderek, I. Tuñón, S. Martí, V. Moliner *ACS Catal.*, 2015, **5**, 1172-1185.
